# Supplementary material for: De-identifying Swedish clinical text - refinement of a gold standard and experiments with Conditional random fields
Source: Springer Nature journal article supplement (doi:10.1186/2041-1480-1-6), 2010-01-01
Supplement: Additional file 1 [file 2041-1480-1-6-s1.pdf]

| No                                 | 1          | 2         | 3    | 4              | 5                   | 6            | 7                    | 8        | 9       | 10            | 11      | 12           | 13      | 14       | 15       | 16        | 17           | 18             | 19                     | 20                    | 21 | 22             | 23   | 24   | 25  | 26          | 27                 | 28        |  |
|------------------------------------|------------|-----------|------|----------------|---------------------|--------------|----------------------|----------|---------|---------------|---------|--------------|---------|----------|----------|-----------|--------------|----------------|------------------------|-----------------------|----|----------------|------|------|-----|-------------|--------------------|-----------|--|
| <b>Annotation classes</b>          | First Name | Last Name | Name | Clinician Name | Proxy/Relative Name | Patient Name | Patient Name initial | Hospital | Disease | Pharma/ names | Measure | Organization | Address | Location | Employer | Job title | Phone Number | e-mail address | Social security number | Medical record number | ID | Account number | Date | Year | Age | Age over 89 | Ethnicity/ Holiday | Undefined |  |
| Gupta et al. 2004                  |            |           | X    | X              |                     |              |                      |          |         |               |         |              | X       | X        | X        | X         | X            | X              | X                      | X                     |    | X              | X    |      |     |             |                    |           |  |
| Uzuner et al. 2007                 |            |           |      | X              | X                   | X            |                      |          |         |               |         |              |         | X        |          | X         | X            |                |                        |                       | X  |                | X    |      |     |             |                    |           |  |
| Kokkinakis & Thurin 2007 (Swedish) |            |           | X    |                |                     |              |                      |          |         | X             | X       | X            | X       | X        |          |           |              |                |                        |                       |    |                | X    |      |     |             |                    |           |  |
| Neamatullah et al. 2008            |            |           |      | X              | X                   | X            | X                    |          |         |               |         |              |         | X        |          | X         |              |                |                        |                       |    |                |      | X    | X   | X           | X                  | X         |  |
| Grouin et al 2009 (French)         | X          | X         |      |                |                     |              |                      |          |         |               |         |              |         | X        |          |           |              |                |                        |                       |    |                | X    |      | X   |             |                    |           |  |

**Additional file 1 (Table S1) – An overview of annotation classes**

An overview of annotation classes used for de-identification by different research groups on clinical corpora
